# Supplementary material
Source: PubMed Central journal article supplement (PMC4899972)
Supplement: NIHMS791924-supplement-supplement_1.pdf [file NIHMS791924-supplement-supplement_1.pdf]

## Supplementary Figure Legends

**Figure S1. Structural determination, Related to Figure 2.**

(A) The repeat:antirepeat duplex in the sgRNA for crystallization. The internal loop in the crRNA repeat-tracrRNA antirepeat duplex was replaced with G:C base pairs for crystallization, and the crRNA and the tracrRNA were fused by a GAAA tetraloop.

(B) The  $2mF_o - DF_c$  electron density map (contoured at  $1.5\sigma$ ). Water molecules are shown as red spheres.

**Figure S2. Comparison of the overall structures of the Cas9 orthologs, Related to Figure 2.**

(A–C) Overall structures of FnCas9 (A), SpCas9 (PDB: 4UN3) (B) and SaCas9 (PDB: 5AXW) (C) in complexes with the sgRNA and the target DNA. The HNH domains are omitted for clarity. The sgRNA in the SpCas9 quaternary complex (PDB: 4UN3) contains stem loops 1–2 and lacks stem loop 3, whereas the sgRNA in the SpCas9 ternary complex (PDB: 4UN3) contains stem loops 1–3. Thus, in (B), the sgRNA (PDB: 4OO8) is docked into the SpCas9–DNA complex (PDB: 4UN3).

**Figure S3. Inter-domain interactions in FnCas9, Related to Figure 2.**

(A) Interaction between the WED and REC1/REC2 domains.

(B) Interaction between the WED and REC1 domains.

(C) Interaction between the WED and PI domains.

(D) Interaction between the RuvC and REC3 domains.

Hydrogen-bonding interactions are shown as dashed lines.

**Figure S4. Structure of the FnCas9 sgRNA scaffold, Related to Figure 3.**

(A–C) Structures of the repeat:antirepeat duplex (A), stem loop 1 (B) and stem loop 2 (C) (stereo view). Hydrogen-bonding interactions are shown as dashed lines. In (B), C53 and U63 are depicted as semi-transparent space-filling models, highlighting the base-stacking interaction.

**Figure S5. DNA targeting mechanism of FnCas9, Related to Figure 5.**

(A) Recognition of the sgRNA seed region by the bridge helix (BH) and the REC1 domain (stereo view). The target DNA strand is omitted for clarity.

(B) Recognition of the +1 phosphate group by the phosphate lock loop (PLL) (stereo view).

Hydrogen-bonding interactions are shown as dashed lines.

**Figure S6. Recognition of sgRNA scaffolds by the Cas9 orthologs, Related to Figure 5.**

(A–C) Recognition of the sgRNA scaffolds by FnCas9 (A), SpCas9 (B) and SaCas9 (C). R:AR duplex, repeat:antirepeat duplex.

(D–E) Recognition of the repeat:antirepeat duplex (D), stem loop 2 (E), and the SL1–SL2 linker (F) by FnCas9. In (F), the REC3  $\beta$ -hairpin is inserted between stem loop 2 and the SL1–SL2 linker.

**Figure S7. Recognition of the sgRNA core regions by the Cas9 orthologs, Related to Figure 5.**

(A–C) Recognition of the sgRNA core regions by FnCas9 (A), SpCas9 (B) and SaCas9 (C) (stereo view). Hydrogen-bonding and electrostatic interactions are shown as dashed lines.

**Table S1. Data Collection and Refinement Statistics, Related to Figure 2.**

|                                                     | TGG PAM<br>(Native)     | TGA PAM<br>(Native)     | TGG PAM<br>(RHA variant) | TGG PAM<br>(SeMet)      |
|-----------------------------------------------------|-------------------------|-------------------------|--------------------------|-------------------------|
| <b>Data collection</b>                              |                         |                         |                          |                         |
| Beamline                                            | SPring-8 BL41XU         | SPring-8 BL41XU         | SPring-8 BL41XU          | SLS PXIII               |
| Wavelength (Å)                                      | 1.0000                  | 1.0000                  | 1.0000                   | 0.9780                  |
| Space group                                         | <i>P</i> 2 <sub>1</sub> | <i>P</i> 2 <sub>1</sub> | <i>P</i> 2 <sub>1</sub>  | <i>P</i> 2 <sub>1</sub> |
| Cell dimensions                                     |                         |                         |                          |                         |
| <i>a</i> , <i>b</i> , <i>c</i> (Å)                  | 81.9, 159.1, 96.8       | 81.6, 159.3, 96.7       | 81.6, 156.0, 96.7        | 81.3, 157.4, 96.5       |
| $\alpha$ , $\beta$ , $\gamma$ (°)                   | 90, 107.0, 90           | 90, 106.9, 90           | 90, 106.9, 90            | 90, 106.8, 90           |
| Resolution (Å)*                                     | 46.3–1.7<br>(1.73–1.70) | 46.3–1.7<br>(1.73–1.70) | 46.3–1.7<br>(1.73–1.70)  | 19.9–2.3<br>(2.34–2.30) |
| <i>R</i> <sub>merge</sub>                           | 0.062 (0.72)            | 0.060 (1.42)            | 0.039 (0.77)             | 0.091 (1.02)            |
| <i>R</i> <sub>pim</sub>                             | 0.037 (0.44)            | 0.024 (0.56)            | 0.024 (0.47)             | 0.026 (0.28)            |
| <i>I</i> / $\sigma$ <i>I</i>                        | 14.2 (2.8)              | 19.6 (2.4)              | 20.3 (2.5)               | 19.1 (2.0)              |
| Completeness (%)                                    | 96.3 (96.2)             | 98.8 (97.9)             | 98.9 (98.7)              | 99.7 (98.9)             |
| Multiplicity                                        | 7.2 (7.2)               | 14.1 (14.3)             | 7.0 (7.1)                | 14.3 (13.8)             |
| CC(1/2)                                             | 0.99 (0.65)             | 0.99 (0.86)             | 1.00 (0.74)              | 0.96 (0.86)             |
| <b>Refinement</b>                                   |                         |                         |                          |                         |
| Resolution (Å)                                      | 46.3–1.7                | 49.7–1.7                | 46.3–1.7                 |                         |
| No. reflections                                     | 249,252                 | 255,162                 | 254,945                  |                         |
| <i>R</i> <sub>work</sub> / <i>R</i> <sub>free</sub> | 0.190 / 0.214           | 0.186 / 0.210           | 0.187 / 0.214            |                         |
| No. atoms                                           |                         |                         |                          |                         |
| Protein                                             | 11,672                  | 11,755                  | 11,752                   |                         |
| Nucleic acid                                        | 2,786                   | 2,786                   | 2,786                    |                         |
| Ion                                                 | 24                      | 24                      | 24                       |                         |
| Solvent                                             | 1,000                   | 992                     | 998                      |                         |
| <i>B</i> -factors (Å <sup>2</sup> )                 |                         |                         |                          |                         |
| Protein                                             | 50.3                    | 50.2                    | 52.1                     |                         |
| Nucleic acid                                        | 39.5                    | 40.2                    | 40.0                     |                         |
| Ion                                                 | 52.7                    | 54.2                    | 53.4                     |                         |
| Solvent                                             | 34.7                    | 40.3                    | 40.6                     |                         |
| R.m.s. deviations                                   |                         |                         |                          |                         |
| Bond lengths (Å)                                    | 0.011                   | 0.015                   | 0.014                    |                         |
| Bond angles (°)                                     | 1.46                    | 1.492                   | 1.45                     |                         |
| Ramachandran plot (%)                               |                         |                         |                          |                         |
| Favored region                                      | 97.4                    | 97.2                    | 96.9                     |                         |
| Allowed region                                      | 0.6                     | 3.3                     | 0.4                      |                         |
| Outlier region                                      | 0.1                     | 0.1                     | 0.1                      |                         |

\*Values in parentheses are for the highest resolution shell.

---

**Table S2. Target Sequences of Mouse Zygotes, Related to Figure 7.**

---

| <b>Gene</b>    | <b>Target sequence</b> | <b>PAM</b> | <b>Indel detection</b> |
|----------------|------------------------|------------|------------------------|
| <i>Tet1EX4</i> | CAGGGAGCTCATGGAGACTAGG | TGA        | <i>Bfal</i>            |
| <i>Tet1EX4</i> | CACTTGGTCCTGCCCAAGGTG  | TGT        | <i>EcoT14 I</i>        |
| <i>Tet1EX4</i> | GTGGCTGCTGTCAGGGAGCTCA | TGG        | <i>SacI</i>            |
| <i>Tet1EX4</i> | ATGGAGACTAGGTGAGGAACTC | TGC        | HMA                    |

---



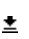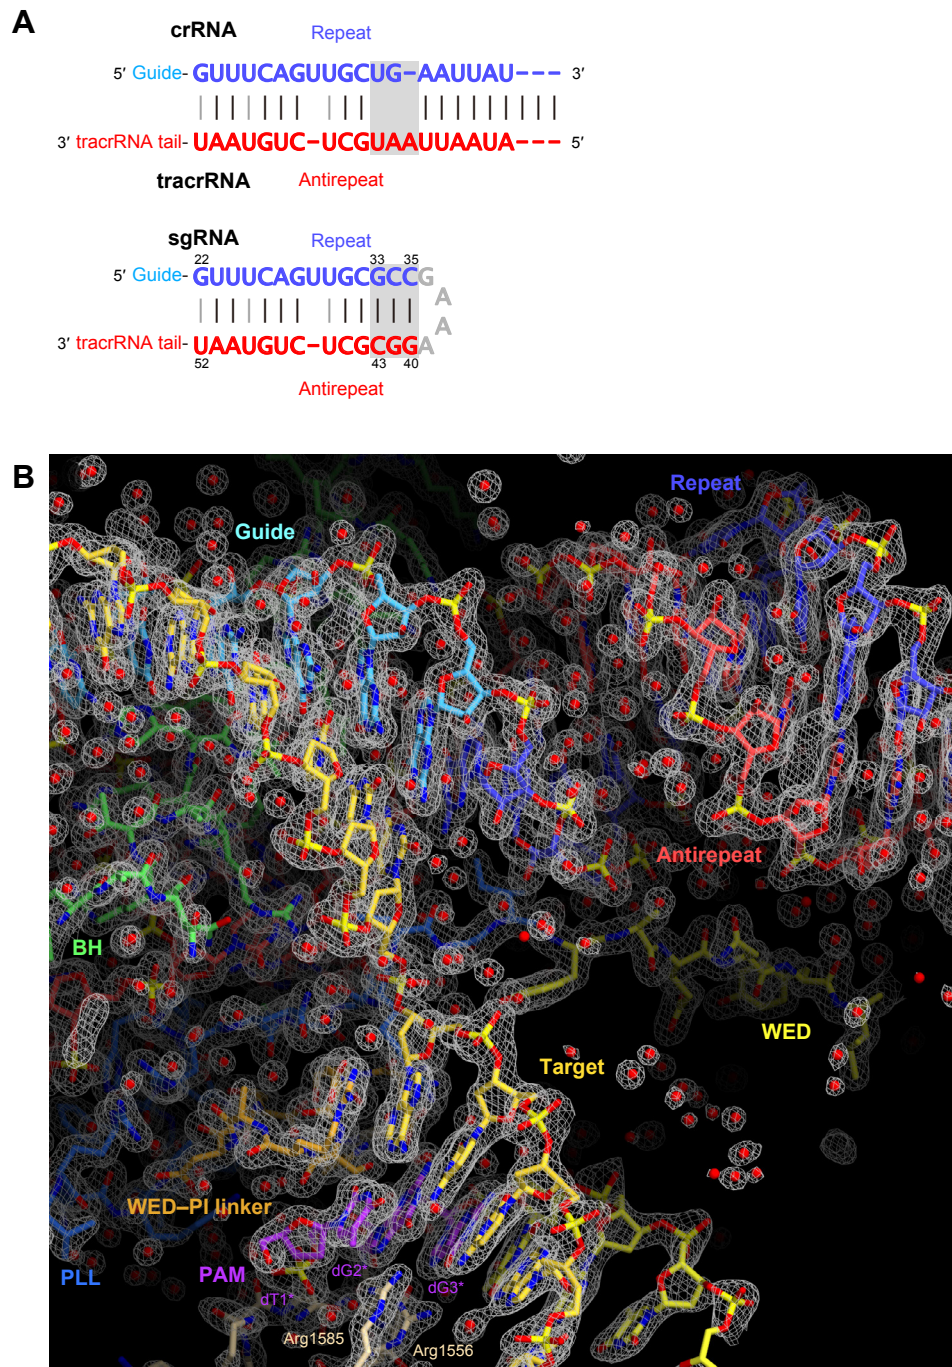

# Figure S1

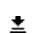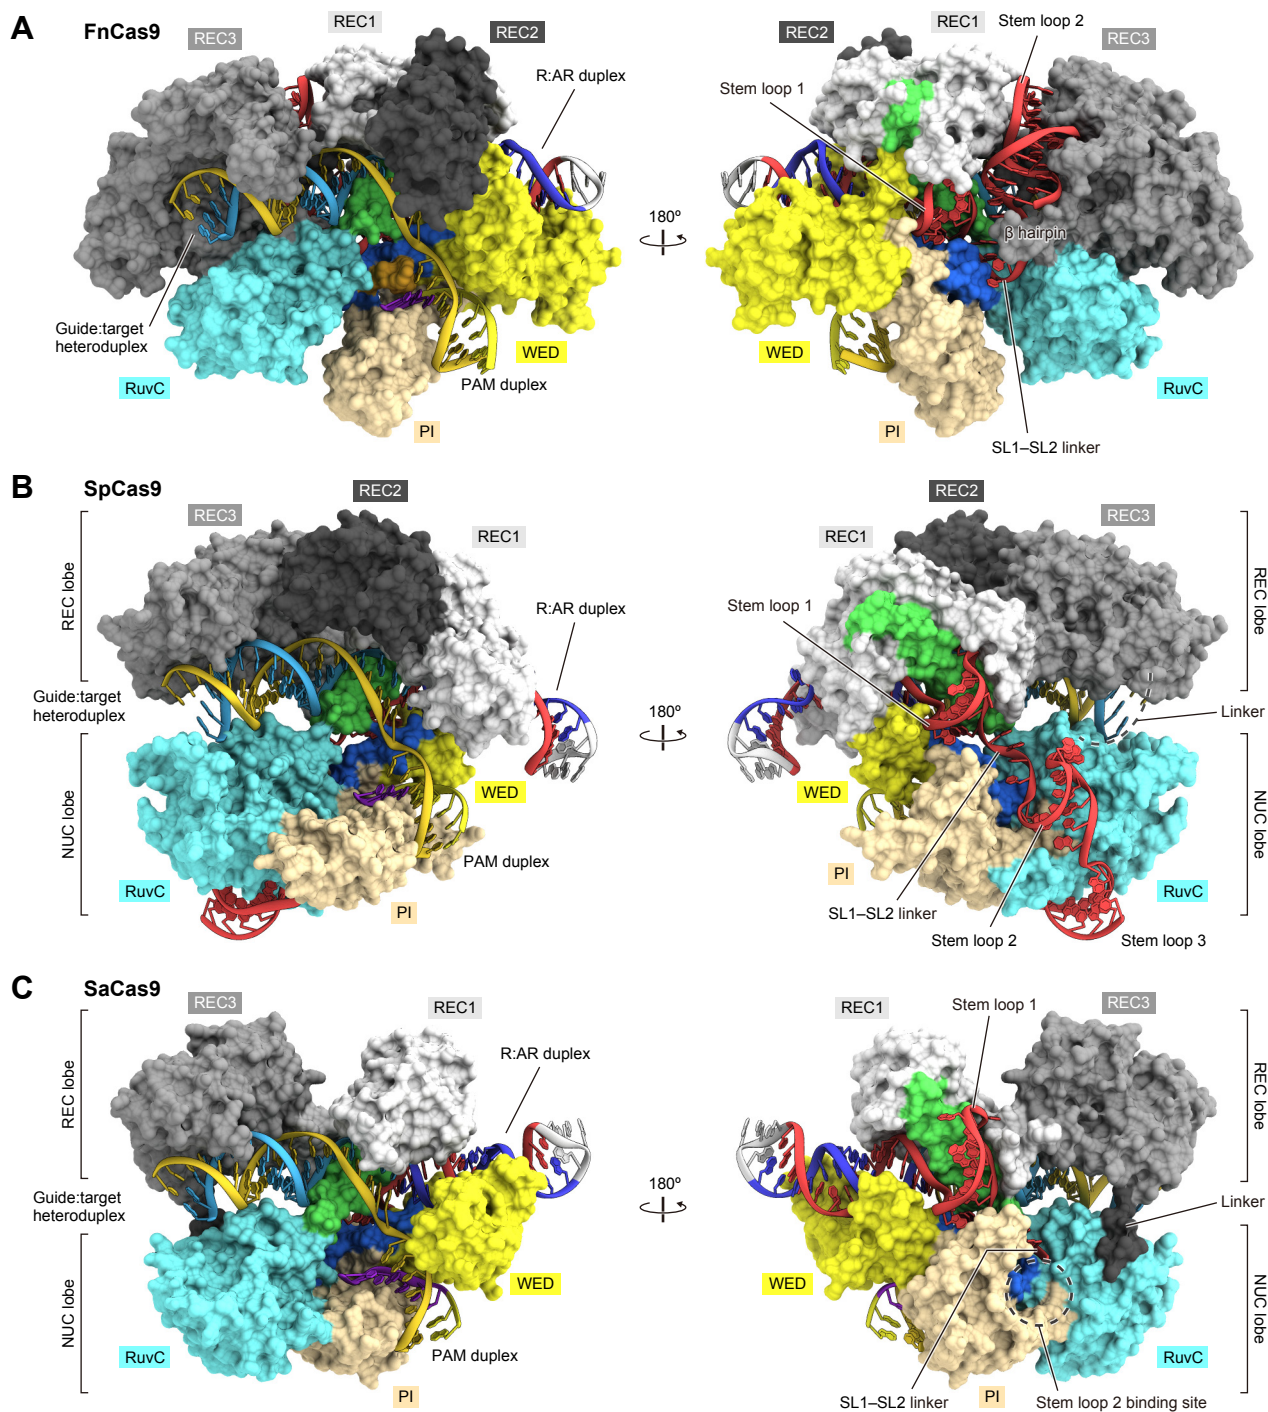

# Figure S2



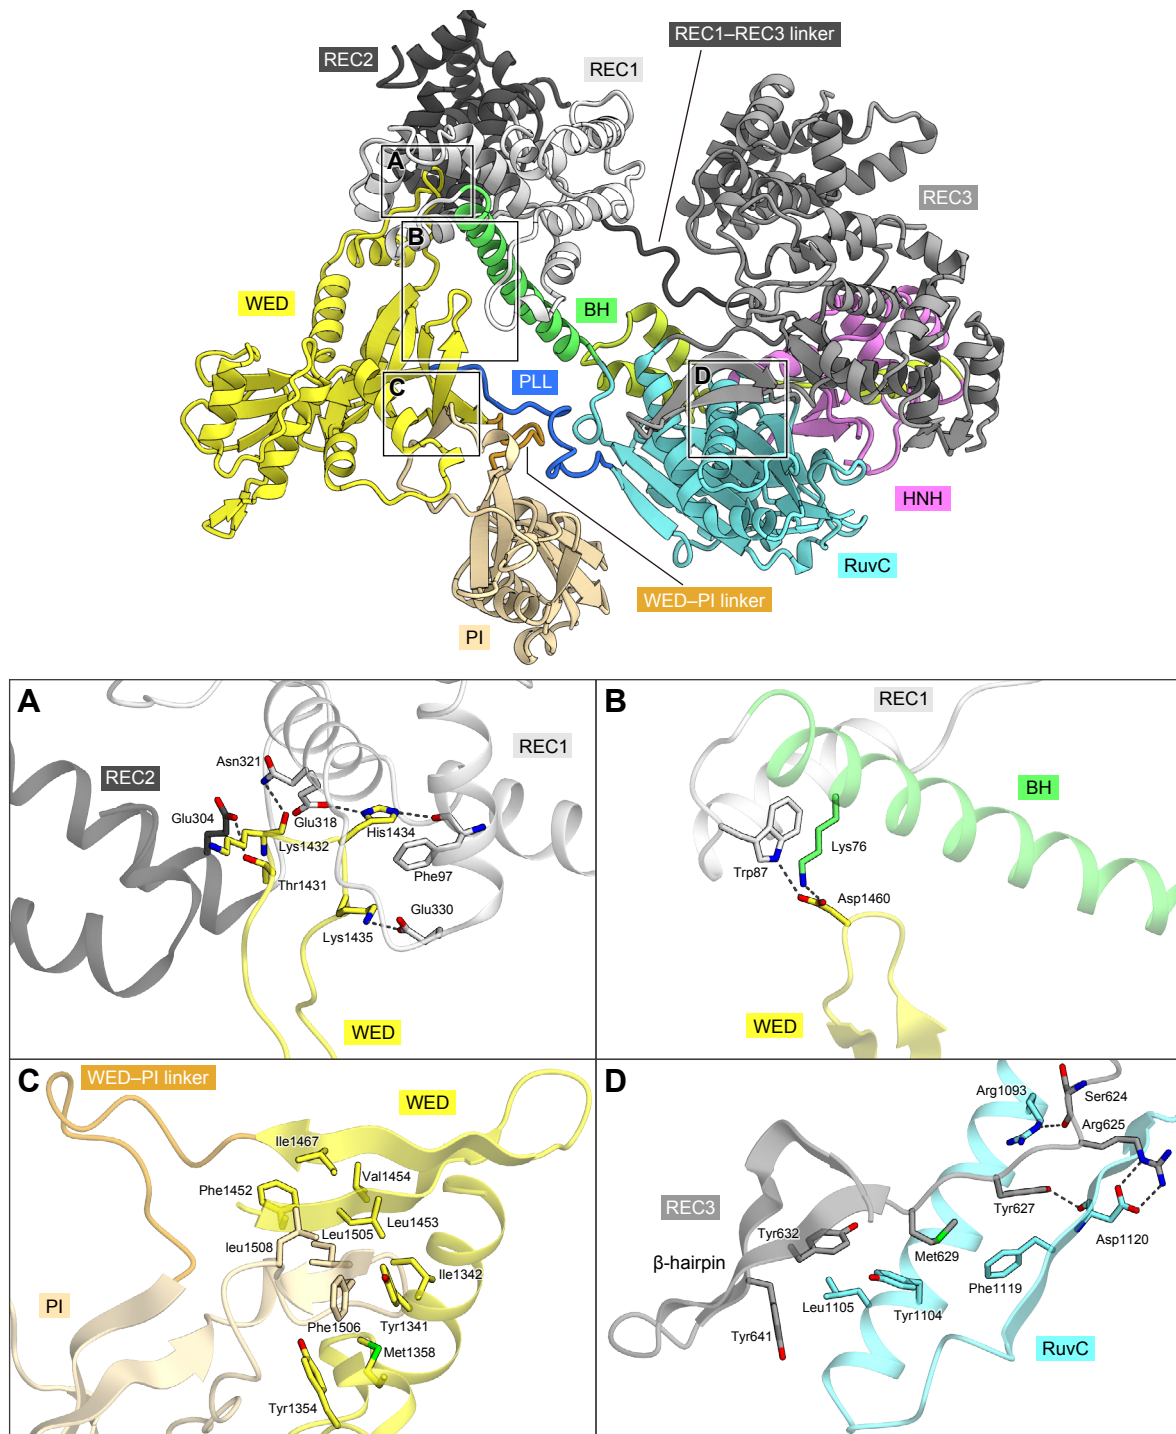

# Figure S3

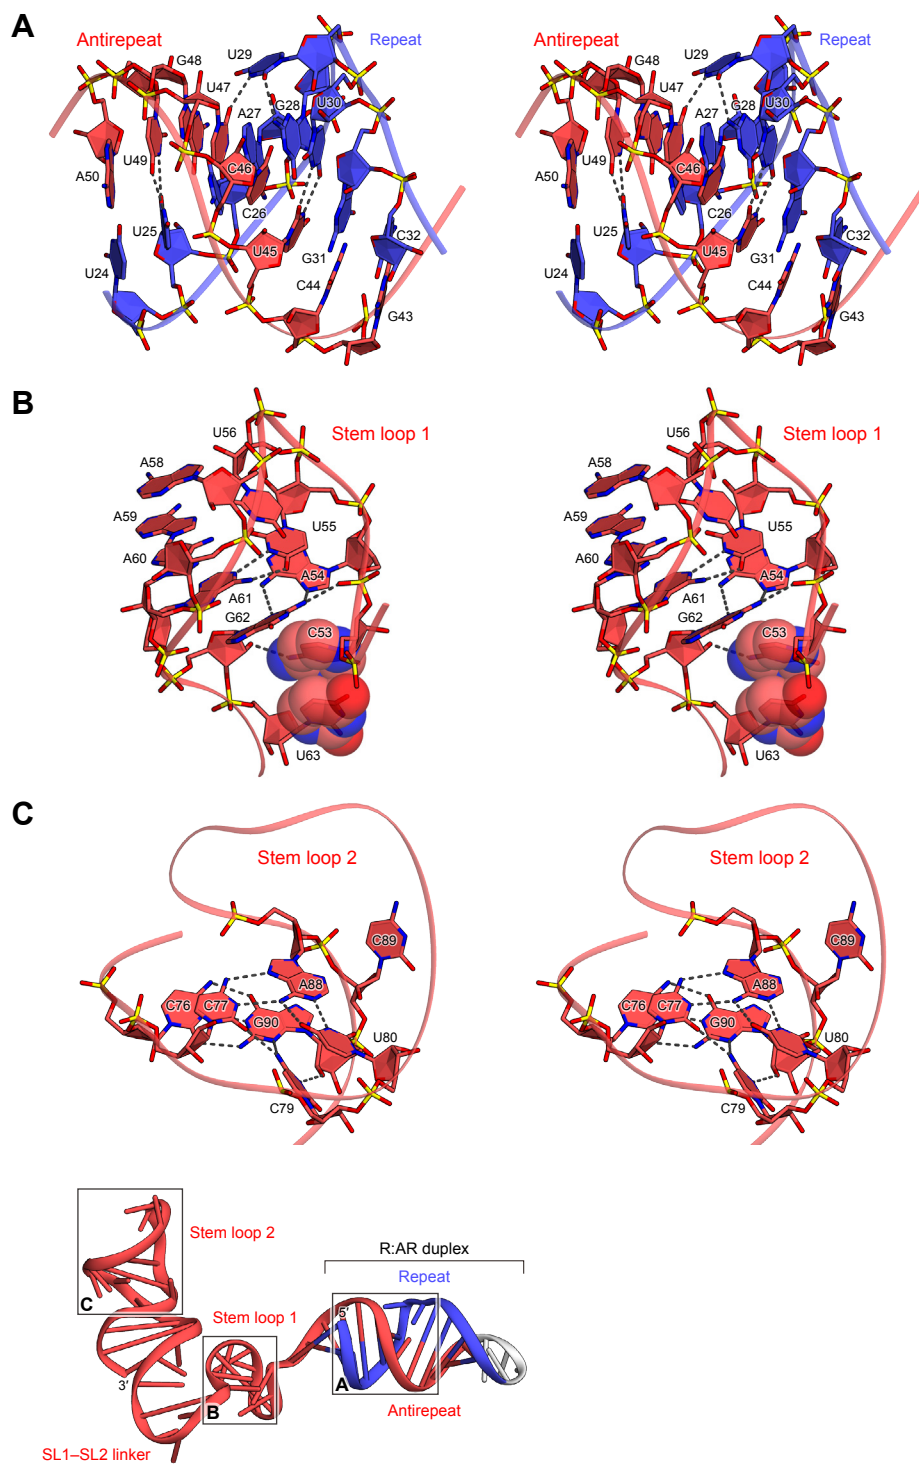

# Figure S4

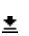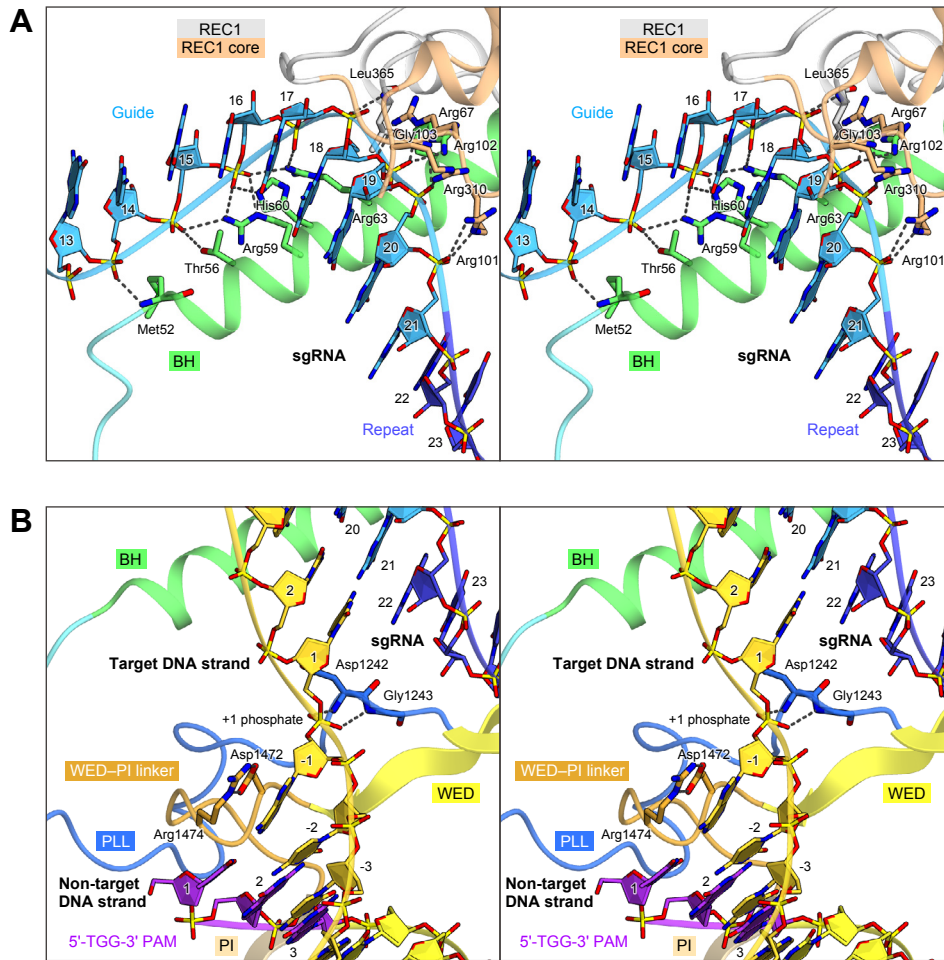

# Figure S5

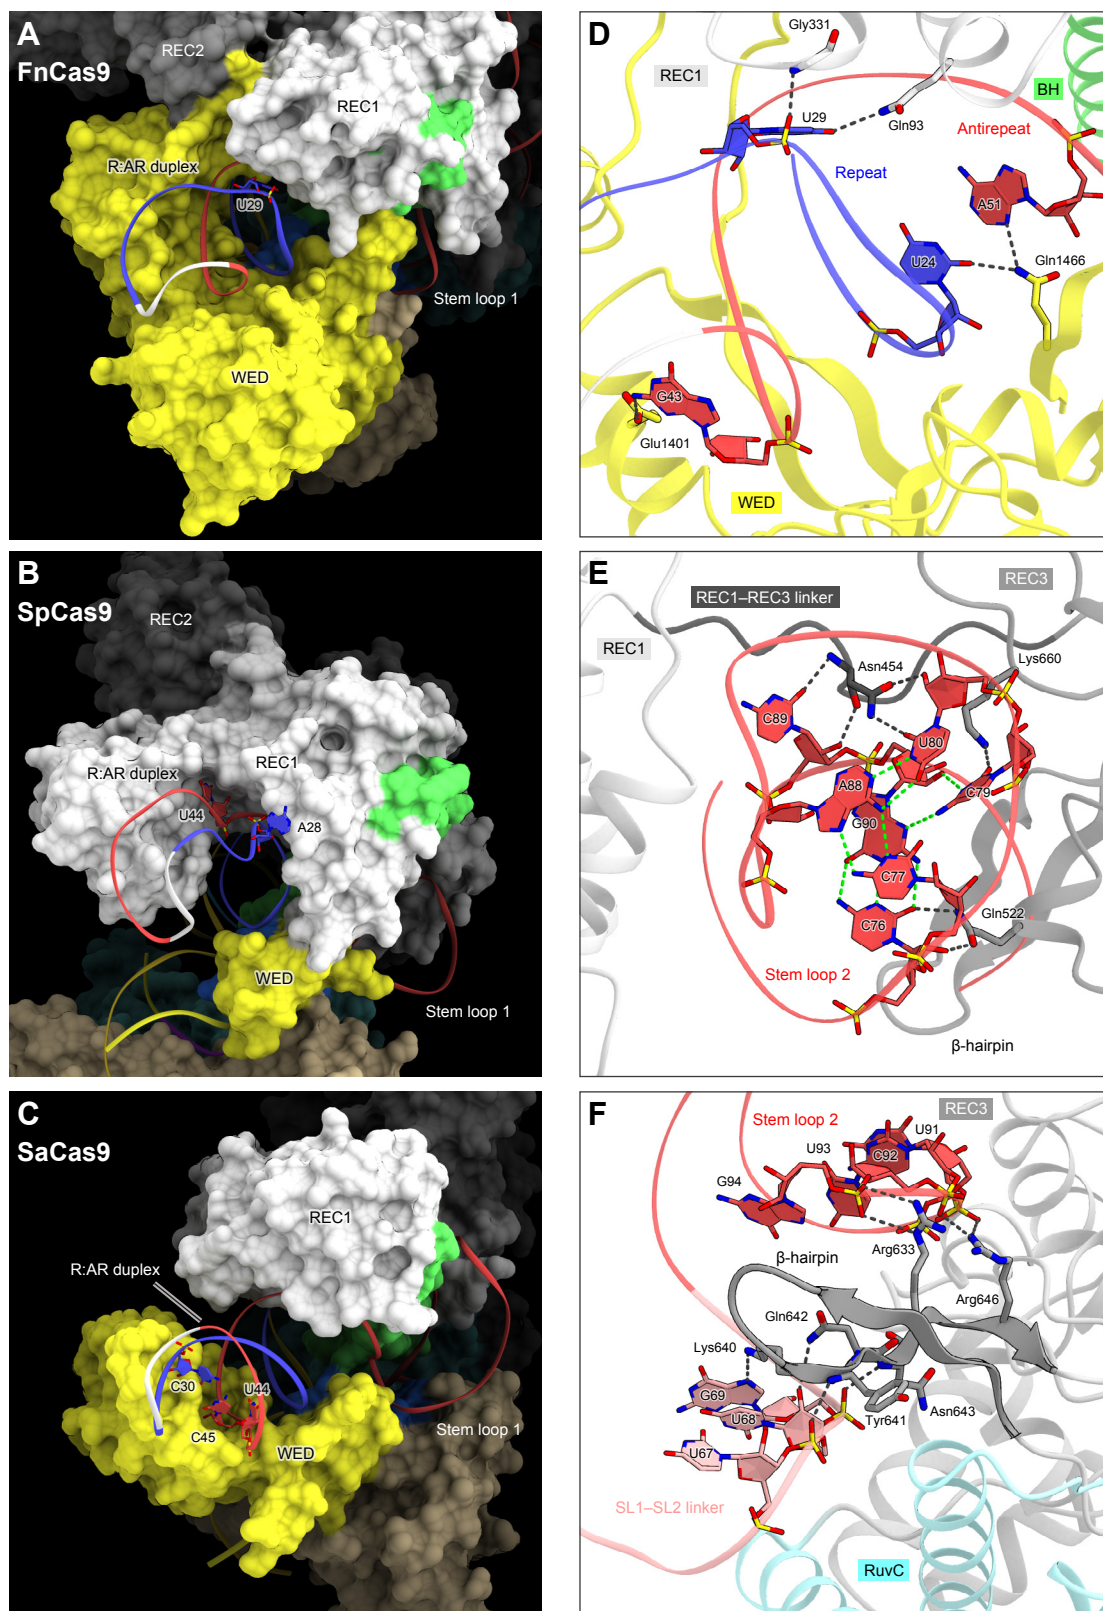**Figure S6**



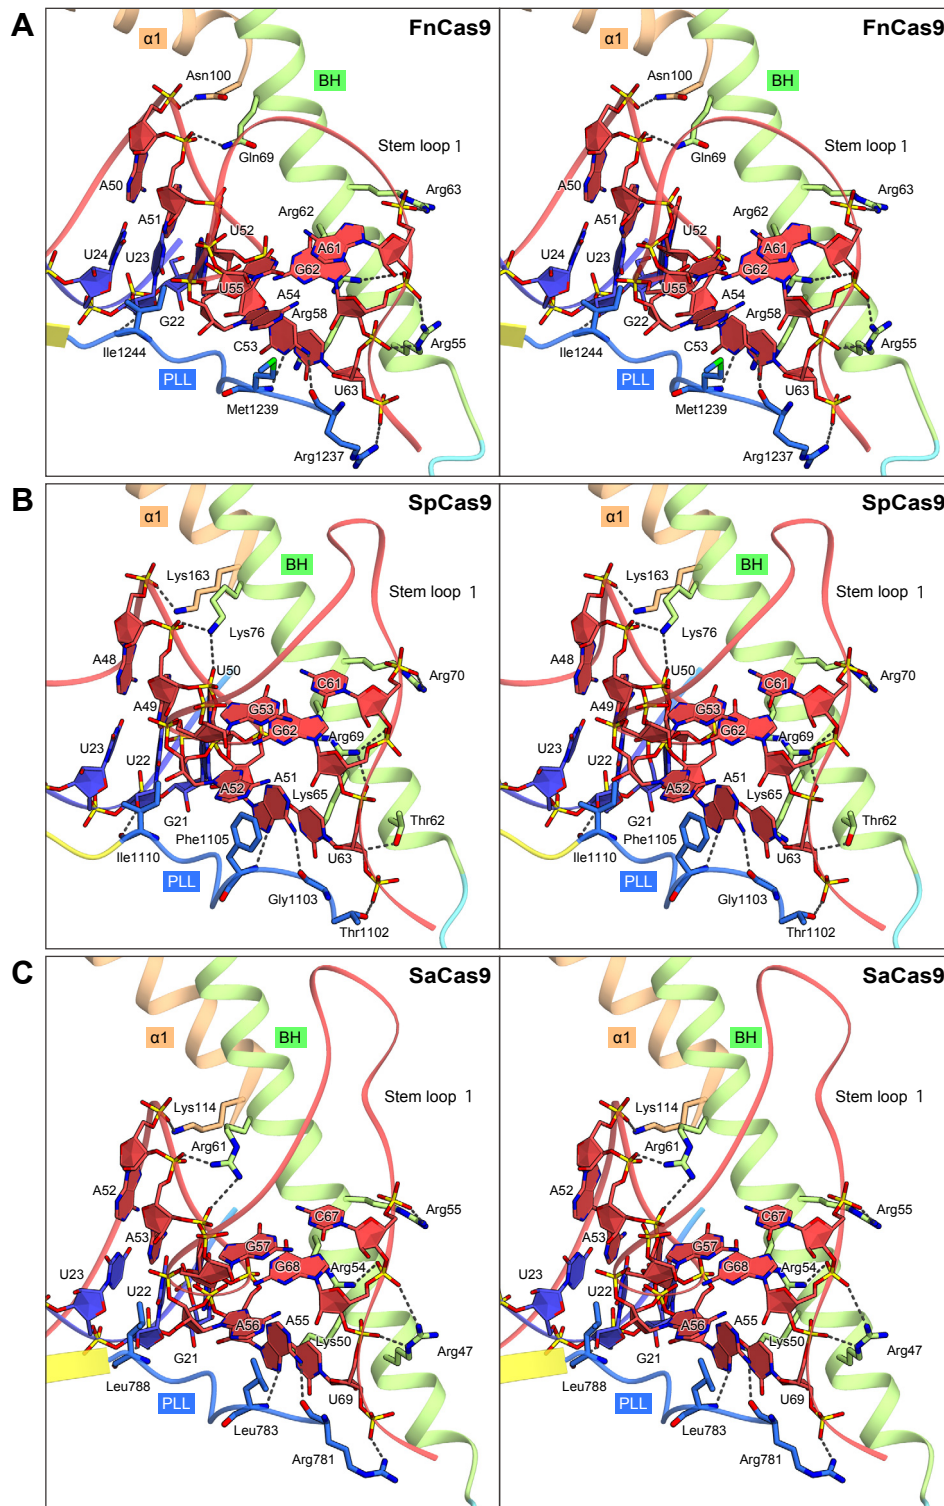**Figure S7**
